# Supplementary material for: hnRNPL and nucleolin bind LINE-1 RNA and function as host factors to modulate retrotransposition
Source: PubMed Central journal article supplement — Nucleic Acids Res. 2012 Nov 17;41(1):575–85. doi: 10.1093/nar/gks1075 (PMC3592465; doi:10.1093/nar/gks1075), 2012-11-17
Supplement: supp_gks1075_nar-02529-d-2012-File010.pdf [file supp_gks1075_nar-02529-d-2012-File010.pdf]

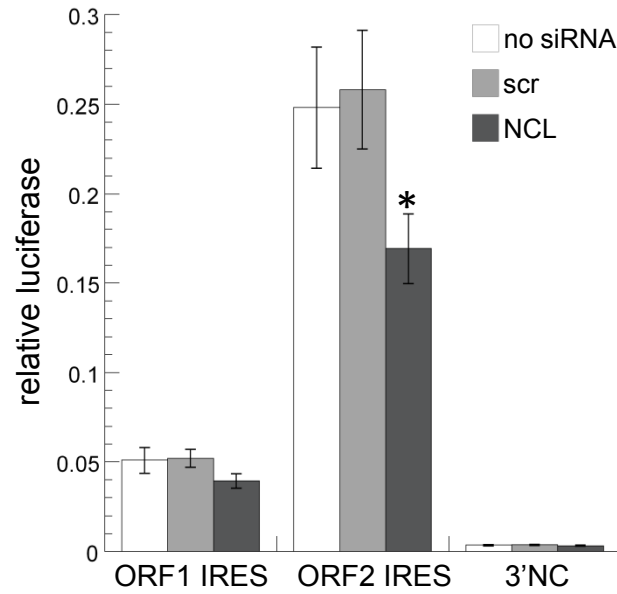

Figure S1. Average effect of nucleolin knockdown on the ORF2 IRES activity. Graph plots the mean relative luciferase ratio  $\pm$  sem from three experiments, each with triplicate replicates. Cells were first transfected with the indicated siRNA, then with pRF containing the ORF1 IRES, ORF2 IRES or negative control 3'UTR regions of L1 RNA as indicated. Only the ORF2 IRES was significantly (\*) decreased, by 33%, in nucleolin knockdown compared to the scr-treated control cells (Tukey  $p = 0.04$ ,  $n = 3$ ).
